# Supplementary material for: The influence of different deep-sea coral habitats on sediment macrofaunal community structure and function
Source: PeerJ. 2018 Jul 20;6:e5276. doi: 10.7717/peerj.5276 (PMC6055693; doi:10.7717/peerj.5276)
Supplement: Supplemental Information 3 — Each data point is a compilation of individual vertical fraction data values are averages. Blank cells indicate no data. [file peerj-06-5276-s003.xlsx]

## Sheet: Metadata
Authors:	Jill R. Bourque
	Amanda W.J. Demopoulos
Institution:	U.S. Geological Survey Wetland and Aquatic Research Center
	7920 NW 71st St
	Gainesville, FL 32653
Contact:	jbourque@usgs.gov
Table contains compiled core data.
Raw data can be found at:	https://doi.org/10.5066/F7TH8KXD
Header Name	Description
Group	Assigned group that corresponds to co-located infaunal sediment cores
Site	Bureau of Ocean Management Lease Block designation for collection location
Depth	Depth of sample collection in meters
Habitat	Coral type sediments were collected adjacent to. Lophelia=Lophelia pertusa; Madrepora=Madrepora oculata; Octocorals=Octocorals
Coarse	Percent gravel (>2 mm) content
Sand	Percent sand (<2 mm, >63 µm) content
Mud	Percent mud (<63 µm) content
OC	Percent organic carbon content. All analyses were performed for AlphaAnalytic Labs.

## Sheet: Bourque_etal_GOM_Corals_Supp2
Group	Site	Depth	Habitat	Coarse	Sand	Mud	OC
MC118 A 2011	MC118	887	Madrepora	7.19639	3.3925	89.4111	0.7925
MC118 B 2011	MC118	888	Octocoral	4.24973	9.69786	86.0524	0.77875
MC203 2011	MC203	919	Octocoral	2.77725	9.27479	87.948	0.871687
MC036 A 2011	MC036	1094	Octocoral	0.108344	1.54018	98.3515	0.90025
MC036 B 2011	MC036	1094	Octocoral	0.0597143	2.9613	96.979	0.999938
VK906 A 2011	VK906	402	Lophelia	27.2567	19.6067	53.1366	1.97417
VK906 B 2011	VK906	392	Lophelia	27.2567	19.6067	53.1366	2.03675
MC507 2011	MC507	1043	Octocoral	0.0446087	1.38985	98.5655	0.849437
VK826 2011	VK826	464	Lophelia	42.5056	16.6777	40.8167	2.03
AT357 A 2011	AT357	1051	Madrepora	11.7663	4.51969	83.714	1.21769
AT357 B 2011	AT357	1048	Octocoral	5.07216	7.31335	87.6145	0.770583
GB299 2010	GB299	340	Octocoral	2.65	14.25	85.92	0.368
GC140 2010	GC140	263	Octocoral				1.88
GC249 2010	GC249	810	Octocoral	0.0352646	3.57479	96.3899	0.526
MC118 2010	MC118	883	Madrepora				0.535
MC751 2010	MC751	439	Lophelia				0.302
MC885 2010	MC885	633	Madrepora	1.15818	2.80959	96.0322	0.364
VK826 O 2010	VK826	461	Lophelia	37.46	21.5	36.14	0.876
VK826 Q 2010	VK826	477	Lophelia	16.1	46.23	40.85	0.734
VK906 J 2010	VK906	390	Lophelia				1.45
VK906 L 2010	VK906	395	Lophelia				2.23
VK906 T 2010	VK906/862	314	Lophelia	41.55	51.35	13.71	3.54
VK906 M23 2010	VK906/862	393	Lophelia				0.453
MC118 T1 2013	MC118	884	Madrepora	13.3598	5.58722	81.053
MC118 X 2013	MC118	885	Madrepora	24.4688	12.8012	62.7301
MC036 2014	MC036	1094	Octocoral	0.255115	2.69632	97.0486
AT357 M13 2013	AT357	1049	Madrepora	6.53348	15.6488	77.8178
AT357 M17 2013	AT357	1054	Madrepora	16.9051	13.9156	69.1792
AT26-14-4706-053	AT357	1050	Octocoral	0.256614	0.995222	98.7482
AT26-14-4706-054	AT357	1054	Octocoral	33.7981	21.3167	44.8852
AT26-14-4705-044	MC885	634	Madrepora	9.8281	4.81393	85.358
AT26-14-4705-045	MC885	635	Octocoral	0.948831	2.32082	96.7303
